# Supplementary material for: Appraisal of WHO Guidelines in Maternal Health Using the AGREE II Assessment Tool
Source: PLoS One. 2012 Aug 13;7(8):e38891. doi: 10.1371/journal.pone.0038891 (PMC3418264; doi:10.1371/journal.pone.0038891)
Supplement: Table S1 — Assessment of the Guidelines on Prevention of PPH. (XLSX) [file pone.0038891.s001.xlsx]

## Sheet: PPH
Table S1. Assessment of the Guidelines on Prevention of PPH
Domain	Item	Appraiser1	Appraiser2	Appraiser3	Appraiser4	Averages	SD	Averages of topics	SD	Sum
Scope and purpose	1	5	6	6	4	5.25	0.957427
	2	7	7	6	6	6.5	0.57735
	3	2	6	7	7	5.5	2.38048	5.75	1.48477	69
Stakeholder Involvement	4	4	6	7	2	4.75	2.21736
	5	1	1	1	1	1	0
	6	1	2	7	2	3	2.70801	2.91667	2.4293	35
Rigour of Development	7	5	7	6	5	5.75	0.957427
	8	4	6	6	6	5.5	1
	9	6	7	5	4	5.5	1.29099
	10	2	6	7	3	4.5	2.38048
	11	5	7	6	7	6.25	0.957427
	12	4	7	7	7	6.25	1.5
	13	3	7	5	4	4.75	1.70783
	14	1	1	1	1	1	0	4.9375	2.03101	158
Clarity of Presentation	15	5	7	7	7	6.5	1
	16	4	7	7	7	6.25	1.5
	17	4	2	5	1	3	1.82574	5.25	2.13733	63
Applicability	18	4	2	2	4	3	1.1547
	19	3	3	3	3	3	0
	20	4	1	2	2	2.25	1.25831
	21	1	1	1	1	1	0	2.3125	1.13835	37
Editorial Independence	22	1	3	1	3	2	1.1547
	23	1	1	1	1	1	0	1.5	0.92582	12
Average		3.34783	4.47826	4.6087	3.82609	4.06522	0.588163
Overall Assessment		3	5	5	4	4.25	0.957427
